1 **Does a postpartum “Green Star” family planning decision aid for**  
2 **adolescent mothers reduce decisional conflict? : A quasi-**  
3 **experimental study**

4 **Short title:** Postpartum family planning decision aid for adolescent

5

6

7 **Stella E. Mushy <sup>1</sup>, Eri Shishido <sup>2</sup>, Shigeko Horiuchi <sup>2,\*</sup>**

8

9 <sup>1</sup>Department of Community Health Nursing, School of Nursing, Muhimbili University of Health  
10 and Allied Sciences, Dar es Salaam, Tanzania

11

12 <sup>2</sup> Department of Midwifery, Graduate School of Nursing Science, St. Luke’s International  
13 University, Tokyo, Japan , 10-1 Akashi-cho, Chuo-ku, Tokyo 104-0044, Japan

14

15 Stella E. Mushy, RN, NM, PhD

16 E-mail: [pendostellam@gmail.com](mailto:pendostellam@gmail.com) (SEM)

17 Orcid ID: <https://orcid.org/0000-0002-4867-2709>

18

19

20 Eri Shishido, RN, NM, PhD

21 E-mail: [eri-shishido@slcn.ac.jp](mailto:eri-shishido@slcn.ac.jp) (ES)

22 ORCID ID: <https://orcid.org/0000-0003-1519-2845>

23 Shigeko Horiuchi, RN, NM, PhD

24 **\*Corresponding author**

25 E-mail: [shigeko-horiuchi@slcn.ac.jp](mailto:shigeko-horiuchi@slcn.ac.jp) (SH)

26 ORCID ID: <https://orcid.org/0000-0001-7412-391>

27

28

29

## Abstract

30 **Aim:** To our knowledge, there are still no studies in Tanzania regarding decision aids on long-  
31 acting reversible contraception. We evaluated the effects of our *postpartum “Green Star” family*  
32 *planning decision aid* on decisional conflict, knowledge, satisfaction, and uptake of long-acting  
33 reversible contraception among pregnant adolescents in Tanzania.

34 **Methods:** We used a facility-based quasi-experimental design with control. The participants were  
35 purposively recruited and randomly assigned (intervention, n = 33; control, n = 33). The  
36 intervention received the routine family planning counseling and decision aid. The control received  
37 only the routine family planning counseling. The primary outcome was change in decisional  
38 conflict measured using the validated Decisional Conflict Scale (DCS). The secondary outcomes  
39 were knowledge, satisfaction, and contraception uptake. We hypothesized that pregnant  
40 adolescents who use the decision aid will have a lower DCS score.

41 **Results:** We recruited 66 pregnant adolescents; 62 completed the study. Participants in the  
42 intervention had a lower mean difference score in the DCS than participants in the control  
43 (intervention: -24.7 [SD 7.99] vs. control: -11.6 [SD 10.9],  $t = -5.53$ ,  $p < 0.001$ ). The mean  
44 difference score in knowledge was significantly higher in the intervention than in the control  
45 (intervention: 4.53 [SD 2.54] vs. control: 2.0 [SD 1.45],  $t = 4.88$ ,  $p < 0.001$ ). The mean score of  
46 satisfaction was significantly higher in the intervention than in the control (intervention: 100 [SD  
47 0.0] vs. control: 55.8 [SD 30.7],  $t = 8.112$ ,  $p < 0.001$ ). Choice of contraception was significantly  
48 higher in the intervention [29 (45.3%)] than in the control [13 (20.3%)] ( $\chi^2 = 17.73$ ,  $p < 0.001$ ).

49 **Conclusion:** The *postpartum “Green Star” family planning decision aid* was useful as it lowered  
50 decisional conflict, improved knowledge and satisfaction with decision making, and enhanced

51 contraception uptake. The decision aid demonstrated positive applicability and affordability for  
52 pregnant adolescents in Tanzania.

53

54 **Keywords:** Decision aid, Postpartum family planning, Long-acting reversible contraception,  
55 Intrauterine copper device, Implants, Pregnant adolescents

56

57

58

59

## 60 Introduction

61 Adolescent pregnancies remain a global public health concern, with the highest rate occurring in  
62 developing countries. Across the world, about 16 million girls aged 15-19 years are estimated to  
63 give birth each year. [1] Most of these pregnancies are unintended, [1, 2] that is, unplanned or  
64 unwanted pregnancies. [3]

65 According to the latest Tanzania Demographic Health Survey, the adolescent population  
66 (10-19 years old) comprises 23% of the total population (44.9 million). Most adolescents are  
67 sexually active before the age of 15 years, and the number of childbearing adolescents aged 15-19  
68 years has gradually increased from 23% in 2010 to 27% in 2016. Moreover, the adolescent fertility  
69 rate has increased from 116 to 132 for every 1000 girls between 2010 and 2016, and almost 56.7%  
70 of adolescents have begun childbearing at the age of 19 years.[4]

71 Adolescent pregnancies remain a major national problem as well as a critical health and  
72 social priority in Tanzania.[5, 6] One-quarter (24%) of the pregnancies among young women are  
73 unintended.[7] The country statistics show that 21% of young women's pregnancies occur among  
74 adolescents aged 15-19 years, of which 18.1% are first births and 2.9% are second or later births.[4]

75 Most women who start childbearing in their teenage years have more children and shorter  
76 birth spacing. Furthermore, most of their births are unintended compared with women who began  
77 childbearing when they were 20 years or older.[8] Subsequent pregnancies during the teen years  
78 compound the economic, physical, and psychological consequences of adolescent mothers.[8, 9]

79 Failure to complete high school and impaired economic sufficiency are significantly associated  
80 with repeated pregnancy during adolescent age.[10]

81 Various factors increase the risk of unintended adolescent pregnancies and rapid repeat  
82 pregnancies (RRPs). These include inconsistent use of contraception, lack of knowledge about  
83 immediate use of family planning after birth, lack of communication between teens and their  
84 healthcare providers, fear of side effects, and myths and misconceptions about family  
85 planning.[11-13] The main barriers hindering a female youth from going to family planning  
86 services are weight gain, reduced sexual desire, irregular bleeding, infertility, and abnormal  
87 vaginal discharge.[11]

88 To prevent early pregnancies, countries across the world, including Tanzania, have  
89 implemented sexual and reproductive health education, enhanced negotiation skills building, and  
90 improved awareness and accessibility to modern contraceptives among adolescents.[14] However,  
91 most interventions focus on preventing first pregnancies with fewer efforts on preventing  
92 subsequent unintended pregnancies during the teen years. Thus, most adolescents continue to  
93 experience RRP despite the availability and accessibility of family planning methods. The majority  
94 (78%) of non-first pregnancies among adolescent mothers in Tanzania experience RRP within 3  
95 months after birth, with over half of the births (51%) occurring in the second year from the last  
96 birth.[13] This is very alarming and calls for researchers, healthcare providers, and policymakers  
97 to exert considerable and sustained effort into supporting pregnant adolescents in the planning and  
98 timing of their subsequent pregnancies.

99 Delaying the second birth will provide a better chance for an adolescent mother to mature  
100 psychologically and biologically. Ultimately, this increases her opportunities to complete high

101 school, make plans for the future, and develop other training skills.[15] Delaying the second birth  
102 will also reduce the risks of premature births, stillbirths, and newborn morbidity and mortality.[16]

103 One of the primary and essential strategies for reducing high-risk pregnancies, which often  
104 occur too early and frequently, is the effective use of family planning.[17] The use of long-acting  
105 reversible contraception immediately after childbirth (i.e., intrauterine copper devices and  
106 implants) is considered a high-impact intervention that reduces the risks associated with adolescent  
107 pregnancy.[18] These methods do not rely on daily, weekly, or monthly use, and have higher  
108 continuation and satisfaction rates than short-acting reversible contraception.[18] Research  
109 findings from a previous study indicated that adolescent mothers who initiated long-acting  
110 reversible contraception after delivery had a lower risk of RRP than adolescent mothers who  
111 started short-acting reversible contraception or who did not use any family planning methods.[19]

112 Despite significant gains in the training of healthcare providers, distribution of family  
113 planning commodities, and provision of quality of care, the postpartum contraceptive uptake  
114 among adolescent mothers in Tanzania remains critically underutilized. Only 12.2% of teenage  
115 mothers use postpartum contraceptives within three months after delivery, with the largest  
116 proportion using injectables followed by pills.[4] Both intrauterine copper devices and implants  
117 are highly effective in preventing pregnancy, and they all last for several years and are easy to  
118 use.[1, 18] For these reasons, pregnant adolescents need comprehensive information about all the  
119 contraception options available in their country to help them decide which contraceptive they can  
120 use. In the case of pregnant adolescents in Tanzania, this involves clarifying their values and  
121 beliefs and what is important to them, particularly regarding intrauterine copper devices and  
122 implants being the only locally available long-acting reversible contraception methods.

123           On the other hand, decision aids in clinical settings have been beneficial as they inform  
124 and educate patients about the available treatment options, which help reduce decisional  
125 conflicts.[20] Recently, decision aids have been widely used to provide health information to  
126 patients and the public.[21] As intrauterine copper devices and implants have almost equal  
127 effectiveness and are long-lasting devices, the choice of pregnant adolescents will depend on their  
128 preferences and lifestyle. Pregnant adolescents must clarify their values by appraising the benefits  
129 and harms of each option and weighing attributes that are personally important to them when  
130 making a choice.

131           Decision aids on family planning counseling have been shown to have a positive outcome.  
132 [22, 23] However, to our knowledge, there are still no studies on decision aids that focus on long-  
133 acting reversible contraception methods to improve family planning uptake by adolescent mothers  
134 immediately after childbirth. To avoid the long-term physiological, psychological, and economic  
135 consequences adolescent mothers must face from unintended RRP owing to non-contraception  
136 use, we developed a decision aid named *postpartum “Green Star” family planning decision aid*.  
137 We borrowed the name “Green Star” from the Kiswahili word “Nyota ya Kijani”, a well-known  
138 word to most people in Tanzania. The Tanzanian government launched the National Family  
139 Planning project in 1992 and used the Kiswahili word “Nyota ya Kijani” as the project name. The  
140 project focused on sensitizing women of reproductive age to use artificial family planning methods  
141 to properly space their pregnancy and limit the number of their children. The *postpartum “Green*  
142 *Star” family planning decision aid* that we newly developed includes updated evidence-based  
143 information on intrauterine copper devices and implants to guide pregnant adolescents decide  
144 regarding the best option for using long-acting reversible contraception methods based on their  
145 preference. Its relevance lies in the guidance provided to pregnant adolescents in using artificial



146 family planning methods to properly space and reduce their pregnancy, similarly to the principle  
147 of “Nyota ya Kijani.”

148         The *postpartum “Green Star” family planning decision aid* was assessed for its feasibility  
149 and found to be practical, useful, and acceptable in addressing the underutilization of postpartum  
150 family planning methods.[11] In the current study, we evaluated the effects of the *postpartum*  
151 *“Green Star” family planning decision aid* on Decisional conflict, Knowledge, Satisfaction, and  
152 Uptake of contraception among pregnant adolescents in Tanzania. We hypothesized that pregnant  
153 adolescents who are using the *postpartum “Green Star” family planning decision aid* will have a  
154 lower decision conflict scale (DCS) score than pregnant adolescents who are not using the decision  
155 aid (control group), and that knowledge and satisfaction scores will be higher in pregnant  
156 adolescents using the decision aid than in pregnant adolescents who are not using the decision aid  
157 (control group).

158

## 159 **Materials and methods**

160

### 161 **Study design, setting, and participants**

162 This study used a quasi-experimental design with a control. The participants were pregnant  
163 adolescents attending antenatal care services at Mkuranga and Kisarawe district hospitals in the  
164 Pwani region. The inclusion criteria were pregnant adolescents who were between 15-19 years, in  
165 their 28 gestation weeks, planning to deliver at the hospital where they are attending antenatal care  
166 services, and willing and provided consent to participate. The exclusion criteria were pregnant  
167 adolescents who were receiving family planning education from other programs.

168 Adolescents were selected as the study population because they have a high risk of RRP and  
169 they critically underutilize different types of modern contraception compared with women above  
170 20 years. [13] The occurrence of RRP in adolescents more severely worsens the health risks and  
171 compounds the socioeconomic inequality than that in women above 20 years because  
172 involvements in education and work training are repeatedly delayed and are less likely to be  
173 attained.

174 The Pwani region is among the regions in Tanzania with the highest childbearing rates.  
175 Thirty percent (30%) of pregnant women in the Pwani region are usually women aged 15-19 years.  
176 [4] Mkuranga and Kisarawe are among the 6 districts of the Pwani region in Tanzania. The  
177 selected district hospitals are government-run public health facilities that also serve low-income  
178 populations. Thus, the turn-up of participants in these district hospitals was expected to be higher  
179 than that in other district hospitals and private health facilities. The study sites (i.e., antenatal clinic,  
180 labor, and postpartum wards) were co-located within the facilities. Mkuranga district hospital was  
181 assigned as the interventional hospital whereas Kisarawe district hospital was assigned as the  
182 control hospital.

183 The sample size in the current study design was based on the minimum sample size suggested  
184 by the Central Limit Theorem of 30 participants in each group.[24] We considered a dropout rate  
185 of 10%, making the number of participants in each group 33. Thus, the total number of participants  
186 recruited in this study was 66.

187 The Ethics Boards of St. Luke's International University (20-A091), Muhimbili University  
188 of Health and Allied Sciences (MUHAS-REC-1-2020-076), and National Institute of Medical  
189 Research approved this study. This study was registered in the Clinical Trials Registry of  
190 University Hospital Information Network in Japan (UMIN000043085). We also obtained

191 permission from the regional and district administrative officers, district medical officers, and  
192 medical staff in charge of the selected hospitals for data collection. The study researchers explained  
193 the purpose, scope, and importance of the study to each participant. The participants who  
194 voluntarily agreed to participate in the study provided both oral and written informed consents.

195 Purposive sampling was used to select the study participants. Enrolment of the study  
196 participants in both groups run concurrently, and the study sites were in the different districts which  
197 reduced data contamination risk. Eligible participants in both groups received three education  
198 sessions before giving birth. Three education sessions offered at Time 1, 2, and 3 were considered  
199 sufficient for the participants to understand the methods and address all the barriers preventing  
200 them from using family planning. For each education session, each participant in the intervention  
201 group first received the routine family planning counseling offered. Then, this was followed by  
202 individual face-to-face family planning counseling education using the contents of the *postpartum*  
203 “*Green Star*” *family planning decision aid*. It took about 30-40 minutes for the research assistant  
204 (RA) to present all the contents to each participant. Every participant received the 10-page  
205 *postpartum* “*Green Star*” *family planning decision aid* and brought it home for further reading  
206 and as reference when needed. The participants in the control group only received a routine family  
207 planning counseling offered at each antenatal clinic visit. Each participant received three education  
208 sessions as in the intervention group. The differences in the education session contents between  
209 the intervention group and the control group are shown in **Box 1**. The study participants were  
210 followed up three times (at 32 gestation week [Time 2], at 36/38 gestation weeks [Time 3], and at  
211 the discharge date after delivery [Time 4]) before completing the study. Recruitment, enrolment  
212 and data for the intervention and control groups were carried out from 1<sup>st</sup> March 2021 to the end  
213 on September 2021.

214

215 **Box 1. Differences in education session contents between intervention and control groups**

| Education session contents                                         | Intervention group <sup>1,2</sup> | Control group <sup>2</sup> |
|--------------------------------------------------------------------|-----------------------------------|----------------------------|
| Description of the family planning methods                         | ✓                                 | ✓                          |
| Making an explicit decision                                        | ✓                                 |                            |
| Information on long-acting reversible contraception options        | ✓                                 | ✓                          |
| Information on other family planning methods                       | ✓                                 | ✓                          |
| Side effects and disadvantages                                     | ✓                                 | ✓                          |
| Benefits and advantages                                            | ✓                                 | ✓                          |
| Comparative tables of long-acting reversible contraception options | ✓                                 |                            |
| Values clarification exercise                                      | ✓                                 |                            |

1: *postpartum “Green Star” family planning decision aid*

2: *Routine family planning guide*

216

217 Two RAs (AM and CM) who were certified midwives recruited the participants and  
218 conducted the study in close coordination with the lead researcher (SM). The criteria for selecting  
219 the RAs were experience in family planning counseling, ability to conduct intervention studies,  
220 and working in an antenatal clinic. Each RA received two days of training separately to avoid data  
221 contamination. The training focused on how to clearly explain the study purpose; who to recruit;  
222 and what, when, and how they should educate the participants. The RAs were also trained on when  
223 and how they should conduct a close follow-up of the participants to minimize lost to follow-up.  
224 The RAs were taught on the types of activities to be carried out at each visit, as well as the kinds  
225 of information to be collected at each visit. The RAs were also trained on the appropriate time to  
226 obtain oral and written informed consents from the study participants.

227

## 228 **Development of the postpartum “Green Star” family planning** 229 **decision aid**

230 We developed the *postpartum “Green Star” family planning decision aid* by initially identifying  
231 the research gap, target population, and study objectives to address the research problem on  
232 adolescent pregnancy. We carefully focused and examined previously published studies when  
233 determining the study objectives.[21, 23, 25-27] Currently, there are limited publications  
234 describing the use of decision aids in reducing decision-making conflicts regarding the utilization  
235 of long-acting reversible contraception methods.

236 Thereafter, we identified the individual needs of the participating pregnant adolescents by  
237 reviewing a previous study that looked into barriers to the utilization of family planning among  
238 female youths in Dar es Salaam, Tanzania.[11] The individual needs of the participants included  
239 inadequate knowledge, particularly of long-acting reversible contraception methods. We found  
240 that female teens have several misbeliefs about contraception methods and how to participate in  
241 decision-making. Most female teens could not decide on their own without involving their sexual  
242 partners.

243 The content, design, and arrangement of the developed prototype decision aid were based  
244 on the Ottawa Patient Decision Aid Development eTraining,[28] International Patient Decision  
245 Aid Standards Collaboration checklist,[29] Theory of Planned Behavior,[30] Health Belief  
246 Model,[31] Social Cognitive Theory,[32] current clinical guides for family planning counseling  
247 for providers,[1, 33] and findings from previous studies on the benefits and side effects of the  
248 different options, satisfaction and continuation rates, and fertility return.[34-40] The prototype  
249 decision aid has four components based on the Ottawa Patient Decision Aid Development

250 eTraining guide: i) know how to make a decision with conviction; ii) understand the characteristics  
251 of the decision; iii) clarify what is important to you, and iv) make the decision. We shared the  
252 prototype decision aid with three experts, namely, our research supervisor and two midwives, all  
253 with extensive years of experience in maternal and child health and in developing decision aids.  
254 The aim of sharing the prototype decision aid was to receive comments on the comprehensibility  
255 and usefulness of the prototype decision aid, which we incorporated in the modified and improved  
256 *postpartum “Green Star” family planning decision aid*.

257 We then previously carried out a feasibility study of the prototype decision aid to assess its  
258 practicality, usefulness, and acceptability as perceived by pregnant adolescents and healthcare  
259 providers.[41] In our previous feasibility study, we interviewed 6 healthcare providers and 12  
260 pregnant adolescents. We asked the study participants questions about the length, flow, and  
261 comprehensibility of the prototype decision aid, and if this tool can meet the decision-making  
262 needs of pregnant adolescents. Based on the feedback from the study participants, we revised the  
263 prototype decision aid. Several comments were given such as the need to rearrange the flow of the  
264 contents, and to change some Kiswahili and English words to reduce ambiguity. The prototype  
265 decision aid was designed for home use as a preconsultation support for the option of using long-  
266 acting reversible contraception. However, both the healthcare providers and the pregnant  
267 adolescents suggested that this tool should be implemented by healthcare providers. After  
268 incorporating all the comments and suggestions provided, we developed the second version of the  
269 decision aid. This second version of the decision aid was shared among developer experts for final  
270 check and approval. We received and integrated several comments and suggestions from the  
271 developer experts. Finally, we developed the third and final version of the decision aid and named  
272 it *postpartum “Green Star” family planning decision aid*. This decision aid was then assessed for

273 its effects on Decisional conflict, Knowledge, Satisfaction, and Uptake of long-acting reversible  
274 contraception.

275

## 276 **Measurements**

### 277 **Primary outcome: Decisional conflict**

278 Decisional conflict was assessed at Time 1 (28 gestational weeks) and at Time 4 (within 2 days  
279 after childbirth) using the decisional conflict scale (DCS). The DCS is a 10-item self-report  
280 questionnaire that measures a patient's uncertainty about what treatment option to choose and the  
281 factors associated with the uncertainty (e.g., lack of information, myths and misconception, and  
282 lack of support).[42] The DCS has 4 subscales: Informed, Clarity, Support, and Uncertainty). Items  
283 were answered using a 3-point Likert scale (0 = "Yes"; 2 = "unsure"; 4 = "no") with scores ranging  
284 from 0 to 100. A higher score meant a higher decisional conflict and uncertainty, and vice  
285 versa.[42] As we adapted items in the DCS, we conducted Cronbach's Alpha test to check for  
286 internal consistency of the DCS items, and we obtained 0.848 which was higher than the  
287 commonly recommended value of 0.6. The results indicated that a set of items in the DCS were  
288 reliable (i.e., closely related as a group).

289

### 290 **Secondary outcomes**

291 The secondary outcomes were Knowledge, Satisfaction with decision-making, and Uptake of long-  
292 acting reversible contraception. Knowledge was assessed at Time 1 and Time 3 (36-38 gestational  
293 weeks). We created a knowledge questionnaire to test the participants' knowledge of long-acting  
294 reversible contraception. We adapted questions from different reports,[11, 33-35, 38-39, 43] which

295 included advantages, disadvantages, side effects, myths, and misconceptions commonly existing  
296 in the community. The knowledge questionnaire had 7 questions each with a score of 1 for a total  
297 of 7 scores. The questions required a “yes” or “no” response. A score of 7 indicated that a  
298 participant is knowledgeable about long-acting reversible contraception and vice versa.  
299 Satisfaction was only assessed at Time 4. We assessed satisfaction using an effective decision-  
300 making subscale of the DCS that had 4 items with 3 responses (4 = “yes”, 2 = “unsure”, 0 = “no”)  
301 with scores ranging from 0 to 100. A higher score indicated a higher satisfaction with decision-  
302 making and vice versa. The decision on which option to use following childbirth was only assessed  
303 at Time 4 using 1 question that asked, “which option do you prefer?”

304

## 305 **Demographic data**

306 The information collected as part of the questionnaire included Age, Parity, Highest education  
307 level, Occupation, and Marital status.

308

## 309 **Data processing and analysis**

310 Data were descriptively analyzed using IBM SPSS Statistics version 24.0. Data cleaning was  
311 performed using frequency distribution tables to confirm if the data were correctly entered. To  
312 ensure the validity and reliability of the data results, each variable was manually cross-checked  
313 and corrections were made when necessary to avoid altering the statistical analysis. The Shapiro-  
314 Wilk test was conducted, and the histogram distributions were checked. Descriptive analysis was  
315 used to analyze the demographic information of the participants to determine frequencies and  
316 percentages of their distribution within groups. The chi-square test was conducted to analyze data



317 and to observe the distribution within the group for the ordinal and between groups for categorical  
318 data. The analysis was based on calculating the mean score differences of the selected variables at  
319 Time 1, Time 2, Time 3, and Time 4 between groups. The independent sample t-test was performed  
320 to compare the mean scores of DCS, Knowledge, and Satisfaction between groups. The statistical  
321 tests were performed with a two-sided 5% level of significance.

322

## 323 **Results**

### 324 **Flow of the study**

325 Data were collected for 7 months from early March to the end of September 2021. The participant  
326 flow diagram is shown in **Fig 1**. A total of 80 pregnant adolescents were eligible, but only 66 gave  
327 their written informed consent and were included in the study with 33 participants in each group.  
328 Two participants, one from the intervention and one from the control group were lost to follow-up  
329 and were excluded from the analysis. Therefore, a total of 64 participants were included for  
330 analysis, each group with a total of 32 participants.

331

### 332 **Fig 1. Flow diagram of study participants**

333

### 334 **Sociodemographic characteristics of the study participants**

335 Details of the sociodemographic information of the study participants are shown in **Table 1**. The  
336 mean age of the study participants in the intervention group was 17.5 (1.29) years, whereas that in

337 the control group was 18.0 years (SD 0.71) [age range, 15-19 years]. Marital status and occupation  
 338 showed a significant difference between the 2 groups ( $p < 0.001$ ). The ratio of single mothers was  
 339 higher in the intervention group [23 (71.9%)] than in the control group [7 (21.9%)]. Similarly, the  
 340 ratio of self-employed mothers was higher in the intervention group [27 (84.4%)] than in the  
 341 control group [8 (25%)].

342 **Table 1. Sociodemographic characteristics of the study participants**

|                                    | <b>Intervention group<br/>(n = 32)</b> | <b>Control group<br/>(n = 32)</b> | <b>t</b> | <b><math>\chi^2</math></b> | <b>p-value</b> |
|------------------------------------|----------------------------------------|-----------------------------------|----------|----------------------------|----------------|
| <b>Age (years)</b>                 |                                        |                                   |          |                            |                |
| mean                               | 17.5 (SD 1.29)                         | 18.0 (SD 0.71)                    | -2.15    |                            | 0.030          |
| <b>Marital status (%)</b>          |                                        |                                   |          |                            |                |
| Single                             | 23 (71.9)                              | 7 (21.9)                          |          |                            |                |
| Married                            | 9 (28.1)                               | 17 (53.1)                         |          | 19                         | < 0.001        |
| Cohabiting                         | 0                                      | 8 (25.0)                          |          |                            |                |
| <b>Gravidity (%)</b>               |                                        |                                   |          |                            |                |
| 1                                  | 31 (96.9)                              | 29 (90.6)                         |          |                            |                |
| 2                                  | 1 (3.1)                                | 3 (9.4)                           |          | 1.07                       | 0.302          |
| <b>Highest education level (%)</b> |                                        |                                   |          |                            |                |
| Primary                            | 27 (84.4)                              | 27 (84.4)                         |          |                            |                |
| Secondary                          | 3 (9.4)                                | 4 (12.5)                          |          | 0.48                       | 0.788          |
| None                               | 2 (6.2)                                | 1 (3.1)                           |          |                            |                |
| <b>Occupation (%)</b>              |                                        |                                   |          |                            |                |
| Employee                           | 0                                      | 1 (3.1)                           |          |                            |                |
| Self-employed                      | 27 (84.4)                              | 8 (25.0)                          |          |                            |                |
| Housewife                          | 1 (3.1)                                | 20 (62.5)                         | 45.98    |                            | < 0.001        |
| Do not work                        | 4 (12.5)                               | 3 (9.4)                           |          |                            |                |

343

344

345

## 346 **Decisional conflict**

347 The DCS mean scores at Time 1 and Time 4 in the intervention and control groups are shown in  
348 **Table 2**. The total DCS mean score at Time 1 was significantly lower in the intervention group  
349 than in the control group (intervention group: 65.00 [SD 19.1] vs. control group: 77.80 [SD 18.4],  
350  $t = -2.72$ ,  $p = 0.008$ ). The observed mean scores in the DCS subscales “Support” ( $p = 0.723$ ) and  
351 “Uncertainty” ( $p = 0.548$ ) were not significantly different between the 2 groups at Time 1.  
352 However, at Time 4, there was a significant difference in the total DCS mean score between the  
353 intervention group and the control group (intervention group: 3.13 [SD 4.7] vs. control group: 48.5  
354 [SD 29.6],  $t = -8.55$ ,  $p < 0.001$ ). Additionally, the mean scores of the all 4 subscales (i.e., Informed,  
355 Clarity, Support, and Uncertainty) in the DCS between the 2 groups at Time 4 showed a significant  
356 difference ( $p < 0.001$ ). The mean difference score in the DCS (Time 4 minus Time 1) was  
357 significantly lower in the intervention group than in the control group (intervention group: -24.7  
358 [SD 7.99] vs. control group: -11.6 [SD 10.9],  $t = -5.53$ ,  $p < 0.001$ ). The mean difference scores of  
359 all 4 subscales (i.e., Informed, Clarity, Support, and Uncertainty) in the DCS were significantly  
360 lower in the intervention group than in the control group. These results support the hypothesis that  
361 the decision-making conflict score will be lower in the intervention group than in the control group.

362

363

364

365

366

367

368 **Table 2. Mean Scores of the Decisional Conflict Scale**

|                              |          |                    | <b>Intervention group</b><br>(n = 32) | <b>Control group</b><br>(n = 32) | <b>t</b>     | <b>p -value</b>   |
|------------------------------|----------|--------------------|---------------------------------------|----------------------------------|--------------|-------------------|
|                              |          |                    | <b>mean (SD)</b>                      | <b>mean (SD)</b>                 |              |                   |
| Time 1                       | Total    | <b>DCS (0-100)</b> | <b>65.00 (SD 19.1)</b>                | <b>77.80(SD 18.4)</b>            | -2.72        | <b>0.008</b>      |
|                              | Subscale | Informed           | 65.6 (SD 23.9)                        | 86.9 (SD 21.0)                   | -3.79        | < 0.001           |
|                              |          | Clarity            | 72.6 (SD 21.4)                        | 91.4 (SD 21.6)                   | -3.48        | 0.001             |
|                              |          | Support            | 54.6 (SD 23.2)                        | 16.7 (SD 23.5)                   | -0.36        | 0.723             |
|                              |          | Uncertainty        | 85.9 (SD 15.4)                        | 88.2 (SD 15.5)                   | -0.60        | 0.548             |
| Time 4                       | Total    | <b>DCS (0-100)</b> | <b>3.13 (SD 4.70)</b>                 | <b>48.5 (SD 29.6)</b>            | <b>-8.55</b> | <b>&lt; 0.001</b> |
|                              | Subscale | Informed           | 4.17 (SD 8.46)                        | 49.4 (SD 31.5)                   | -7.85        | < 0.001           |
|                              |          | Clarity            | 8.59 (SD 13.6)                        | 53.1 (SD 39.5)                   | -6.02        | < 0.001           |
|                              |          | Support            | 0.52 (SD 2.9)                         | 47.9(SD 27.6)                    | -9.63        | < 0.001           |
|                              |          | Uncertainty        | 0.00(SD 0.00)                         | 43.7(SD 37.0)                    | -6.68        | < 0.001           |
| Differences<br>Time 4-Time 1 | Total    | <b>Differences</b> | <b>-24.7 (SD 7.99)</b>                | <b>-11.6 (SD 10.9)</b>           | <b>-5.53</b> | <b>&lt; 0.001</b> |
|                              | Subscale | Informed           | -7.00 (SD 3.07)                       | -4.00 (SD 4.03)                  | -3.21        | 0.002             |
|                              |          | Clarity            | -6.00 (SD 2.09)                       | -4.00 (SD 3.21)                  | -3.04        | 0.004             |
|                              |          | Support            | -7.00 (SD2.78)                        | 0.00 (SD 2.83)                   | -7.76        | < 0.001           |
|                              |          | Uncertainty        | -6.00 (SD2.20)                        | -2.00 (SD 2.87)                  | -5.71        | < 0.001           |

369

370

371 **Multiple linear regression for predicting DCS score**

372 Multiple linear regression was performed to predict the DCS score based on Age, Occupation, and  
 373 Marital status at Time 1, Time 4, and at the time Differences (Time 4 minus Time 1). Occupation  
 374 was treated as a dummy variable. Age was the only variable that showed a significant relationship  
 375 in the control group, both at Time 1 ( $\beta = 0.455$ ,  $p = 0.015$ ) and at Time 4 ( $\beta = 0.506$ ,  $p = 0.006$ ).  
 376 However, Age did not show a significant relationship at the time Differences (Time 4 minus Time

377 1). As for the intervention group, none of the variables showed a significant relationship with the  
 378 DCS scores (**Table 3**).

379

380 **Table 3. Multiple linear regression for predicting DCS score**

|               | Study arms         | Items              | Beta   | p-value      |
|---------------|--------------------|--------------------|--------|--------------|
| Time 1        | Intervention group | Age                | 0.292  | 0.120        |
|               |                    | Occupation (dummy) | -0.115 | 0.532        |
|               | Control group      | Age                | 0.455  | <b>0.015</b> |
|               |                    | Occupation (dummy) | -0.308 | 0.090        |
| Time 4        | Intervention group | Age                | -0.227 | 0.217        |
|               |                    | Occupation (dummy) | 0.305  | 0.099        |
|               | Control group      | Age                | 0.506  | <b>0.006</b> |
|               |                    | Occupation (dummy) | -0.092 | 0.597        |
| Time 4-Time 1 | Intervention group | Age                | -0.333 | 0.073        |
|               |                    | Occupation (dummy) | 0.182  | 0.317        |
|               | Control group      | Age                | 0.240  | 0.211        |
|               |                    | Occupation (dummy) | 0.108  | 0.572        |

381

382

### 383 **Contraceptive knowledge, satisfaction and uptake**

384 At Time 1, the results showed no significant difference in the Knowledge mean score between the  
 385 2 groups (intervention group: 1.84 [SD 1.98] vs. control group: 2.34 [SD 1.61],  $t = -1.1$ ,  $p = 0.274$ ).

386 At Time 3, the Knowledge mean score was significantly higher in the intervention group than in  
 387 the control group (intervention group: 6.38 [1.60] vs. control group: 4.34 [1.82],  $t = 4.733$ ,  $p <$

388 0.001). The mean difference score in Knowledge (Time 3 minus Time 1) in the intervention group

389 was larger than that in the control group (intervention group: 4.53 [2.54] vs. control group: 2.00

390 [1.45],  $t = 4.88$ ,  $p < 0.001$ ). These findings support the hypothesis that the level of knowledge of

391 long-acting reversible contraception will be higher in the intervention group than in the control  
392 group.

393 The mean score of Satisfaction was significantly higher in the intervention group than in  
394 the control group (intervention group: 100.00 [SD 0.0] vs. control group: 55.8 [SD 30.7],  $t = 8.112$ ,  
395  $p < 0.001$ ). The proportion of “yes” responses of each item about Satisfaction was greater in the  
396 intervention group (100%) than in the control group (< 40%). The chi-square test result of each  
397 item between the 2 groups was found to be significant in all items ( $p < 0.001$ ). These results support  
398 the hypothesis that the state levels of Satisfaction with decision making will be higher in the  
399 intervention group than in the control group.

400 The proportion of participants who decided to use long-acting reversible contraception  
401 showed significant differences between the 2 groups. The proportions of participants who “did not  
402 decide to use any option” were 3 (4.7%) in the intervention group and 19 (29.7) in the control  
403 group. However, the proportions of participants who “decided to use implant” were 29 (45.3%) in  
404 the intervention group and 13 (20.3%) in the control group ( $\chi^2 = 17.73$ ,  $p < 0.001$ ). These results  
405 showed that all long-acting reversible contraception users only opted for implants and nobody  
406 chose an intrauterine copper device. These findings support the hypothesis that the proportion of  
407 long-acting reversible contraception uptake will be higher in the intervention group than in the  
408 control group.

409

#### 410 **Logistic regression analysis for long-acting reversible contraception uptake**

411 Age, Marital status, and Occupation showed no significant relationship with long-acting reversible  
412 contraception uptake in the intervention group. However, Age alone showed a significant

413 relationship with long-acting reversible contraception uptake in the control group with a negative  
414  $\beta$  value (Table 4).

415 **Table 4. Logistic regression analysis for long-acting reversible contraception uptake**

| Study arms         | Item           | Beta   | p-value     | Odds | 95% CI |       |
|--------------------|----------------|--------|-------------|------|--------|-------|
|                    |                |        |             |      | Lower  | Upper |
| Intervention group | Age            | -0.56  | 0.45        | 0.57 | 0.13   | 2.50  |
|                    | Marital status | -19.52 | 1           | 0    | 0      |       |
|                    | Occupation     | -20.22 | 1           | 0    | 0      |       |
| Control group      | Age            | -1.55  | <b>0.03</b> | 0.21 | 0.05   | 0.84  |
|                    | Marital status | -0.62  | 0.32        | 0.53 | 0.16   | 1.82  |
|                    | Occupation     | 0.08   | 0.87        | 1.09 | 0.38   | 3.17  |

416

417

## 418 Discussion

419 We evaluated the effects of our recently developed *postpartum “Green Star” family planning*  
420 *decision aid* on pregnant adolescents in terms of their usage of long-acting reversible contraception  
421 following childbirth. Our hypotheses were as follows: pregnant adolescents who use the  
422 *postpartum “Green Star” family planning decision aid* will have a lower DCS score than pregnant  
423 adolescents who do not use the decision aid; Knowledge and Satisfaction scores, and the  
424 proportion of contraception uptake will be higher in pregnant adolescents who receive the  
425 *postpartum “Green Star” family planning decision aid* than in pregnant adolescents who do not  
426 receive the decision aid. All of these hypotheses were supported by our results.

427

## 428 Decisional conflict for adolescent mothers

429 Decision aids are crucial tools for use in clinical settings as they provide patients a chance to be  
430 involved in making medical decisions by weighing the risks and benefits in a balanced manner.  
431 [20] The present findings indicate that the total mean score of DCS was significantly lower in the  
432 intervention group than in the control group. The mean difference scores in the subscales of DCS  
433 were significantly lower in the intervention group than in the control group.

434 The present results concur with the results of a systematic review that involved 105 studies  
435 on decision aids from different areas, namely, cancer screening, prenatal complication diagnosis,  
436 immunization, and diabetic treatments. [20] These studies found that the use of decision aids more  
437 markedly reduced the mean difference in the DCS score in the intervention group (with decision  
438 aids) than in the control group (without decision aids) (MD -9.28, 95% CI: -12.2 to -6.36). The  
439 effect of decision aids on medication choice for diabetes mellitus was also assessed in 3  
440 randomized clinical trials.[27, 44, 45] The findings of these trials showed a significantly lower  
441 mean difference in the DCS score in the intervention group than in the control group. Two clinical  
442 trials involving pregnant women have also been conducted.[25, 46] The first clinical trial assessed  
443 the effect of decision aids on the choice of pregnant women whether to have epidural anesthesia  
444 or not during labor.[25] The second randomized clinical trial evaluated the effect of decision aids  
445 on women with breech presentation at term.[46] The findings of these previous trials were similar  
446 to the findings of the present study in that the mean difference in the DCS score was significantly  
447 lower in the intervention group which received a decision aid than in the control group which  
448 received only a standardized routine care.

449 On the other hand, the present findings are inconsistent with the findings from a previous  
450 study that evaluated the effect of a decision aid on decision-making for the treatment of pelvic  
451 organ prolapse. [47] The previous study found that the DCS score of patients who received a



452 decision aid and standard counseling was not significantly lower than the DCS score of patients  
453 who received only standard counseling ( $p = 0.566$ ). The probable reasons include the already  
454 available pelvic organ prolapse decision aid in the setting and the regular review of information  
455 by the patients together with the clinician at the initial encounter. The observed mean difference  
456 in the DCS score in the study of Brazel et al. was very low in both the intervention and control  
457 group, indicating no significant difference between the 2 groups.[47] The results suggested that  
458 the existing method of “standard counseling” alone was sufficient in their specific type of study  
459 population.

460 In the present study, a significant mean difference was observed in the intervention group  
461 because there are no family planning decision aids in antenatal clinics to help patients decide on  
462 the family planning option that they would take. The unavailability of family planning decision  
463 aids occurs not only in antenatal clinics but also in other clinics such that there are no decision aids  
464 to supplement routine counseling given to patients to aid in their decision-making. A study on the  
465 experiences of diabetic patients and healthcare providers on shared decision-making conducted in  
466 Tanzania found that neither the patients nor the healthcare providers had been using decision-  
467 making aids; the patients reported that only health education tools are being used for educating  
468 them. [48]

469 The DCS in the present study had 4 subscales that were compared between the 2 groups.  
470 The mean difference scores for the subscales Uncertainty, Clarity, Support, and Informed were  
471 significantly lower in the intervention group than in the control group ( $p \leq 0.001$ ). These findings  
472 are consistent with the findings of previous studies.[20,45,46] The participants in the intervention  
473 group expressed their feeling of being more involved in the decision-making process as well as  
474 feeling that they received sufficient information to be able to decide compared with the participants

475 in the control group. Nevertheless, the present findings are inconsistent with the findings of Brazel  
476 et al. [47] who found no significant mean difference scores in the subscales of the DCS between  
477 the intervention and control groups: Uncertainty ( $p = 0.519$ ), Clarity ( $p = 0.590$ ), Support ( $p =$   
478  $0.413$ ), and Informed ( $p = 0.718$ ).

479 The multiple regression analysis of the DCS score based on Age, Marital status, and  
480 Occupation showed Age as the only variable that had a significant relationship with the DCS score  
481 in the control group at Time 1 and Time 4, but not in the intervention group. The findings further  
482 show that as Age increases, the decision conflict score also increases and vice versa. These findings  
483 indicate that if younger adolescents receive the correct information about long-acting reversible  
484 contraception at the right time, this will improve their chances of utilizing family planning  
485 methods. Regarding the lower DCS score in the intervention group, the present findings suggest  
486 that the decision aid played an important role in imparting knowledge and correcting the held  
487 myths and misconceptions of the younger adolescents.

488

## 489 **Knowledge, satisfaction, and uptake of long-acting reversible** 490 **contraception for adolescent mothers**

491 The mean differences in the scores of Knowledge, Satisfaction, and Uptake of long-acting  
492 reversible contraception were significantly higher in the intervention group than in the control  
493 group. In a systematic review [20] of 52 studies, 4 randomized control trials [44, 45, 46, 49] and 1  
494 survey [50] found a significant increase in the scores of Knowledge, Satisfaction with decision  
495 making, and Choice for the treatment options in the intervention group which used a decision aid  
496 compared with the control group which used a standardized routine care. Although the present

497 study showed an increase in contraception uptake, none of the long-acting reversible contraception  
498 users chose an intrauterine copper device as all the participants chose only implants. The main  
499 reasons for not using an intrauterine copper device might be related to individual perception factors  
500 such as myths and misconceptions, and discomfort from postpartum pain. [11]

501 The logistic regression analysis showed that Marital status and Occupation showed no  
502 significant relationship with knowledge and Satisfaction in the 2 groups. Only Age showed a  
503 significant relationship with long-acting reversible contraception uptake in the control group. The  
504 study participants in the control group were 21% (odds = 0.21) less likely to use long-acting  
505 reversible contraception than the study participants in the intervention group. Younger adolescents  
506 in the control group were more likely to utilize long-acting reversible contraception than older  
507 adolescents. These findings indicate that if family planning programs exert greater efforts in  
508 reaching out to pregnant adolescents and ensuring that they receive the correct information at the  
509 right time regarding postpartum family planning, its uptake will be markedly improved following  
510 childbirth.

511 The present findings also suggest that the decision aid played a significant role in increasing  
512 Knowledge which ultimately improved the uptake of the available and preferred long-acting  
513 reversible contraception following childbirth. The making of a choice implies that pregnant  
514 adolescents were able to learn from the *postpartum "Green Star" family planning decision aid*, and  
515 this changed their minds by correcting their held myths or misconceptions about long-acting  
516 reversible contraception. The present findings also show that receiving the correct information at  
517 the right time regarding long-acting reversible contraception improves satisfaction with decision-  
518 making.

519 In the present study, none of the long-acting reversible contraception users used an  
520 intrauterine copper device. This non-usage was related to the fear of expulsion and risk of  
521 infection. If an intrauterine copper device is inserted immediately after childbirth and infection  
522 prevention control measures are adhered to, then the risk of expulsion and infection would be  
523 minimal. However, the *postpartum "Green Star" family planning decision aid* did not have any  
524 information regarding the timely insertion of an intrauterine copper device. In future studies, this  
525 information will be included in the decision aid to improve intrauterine copper device uptake.

526

## 527 **Strengths and limitations**

528 To our knowledge, this is the first study in Tanzania that used a postpartum family planning  
529 decision aid to assist in decision-making of pregnant adolescents regarding which long-acting  
530 reversible contraception they should use following childbirth. This means the open practicality of  
531 using the decision aid for healthcare even though the subjects are adolescents. To avoid data  
532 contamination between groups, the hospital in the intervention group was located in a different  
533 district from the hospital in the control group, that is, 2-3 hours of driving using a private transport.  
534 On the other hand, the present findings cannot be generalized, unless a randomized controlled  
535 study is conducted.

536

## 537 **Conclusions**

538 To our knowledge, this is the first quasi-experimental study with a control that evaluated the effects  
539 of our recently developed *postpartum “Green Star” family planning decision aid* on pregnant  
540 adolescents’ choice of using long-acting reversible contraception. The decision aid significantly  
541 lowered the decision-making conflict, improved knowledge and satisfaction with decision-  
542 making, and enhanced the uptake of available long-acting reversible contraception. The overall  
543 findings indicate the usefulness of the *postpartum “Green Star” family planning decision aid* as it  
544 supplemented and supported patient-provider communications during family planning counseling  
545 in antenatal clinics.

546

## 547 **Acknowledgments**

548 We would like to express our gratitude to Dr. Edward Barroga ([https://orcid.org/0000-0002-8920-](https://orcid.org/0000-0002-8920-2607)  
549 [2607](https://orcid.org/0000-0002-8920-2607)), Medical and Nursing Science Editor and Professor of Academic Writing at St. Luke’s  
550 International University for reviewing and editing the manuscript.

551

## 552 **Funding**

553 This work was supported by Japan Society for the Promotion of Science (JSPS) Core-to-Core  
554 Program (2021-2024) (PI: Shigeko Horiuchi). The funding was used in the data collection, analysis,  
555 and in writing the manuscript.

556

## 557 **Competing interests**

558 The authors declare that they do not have any competing interests associated with this study.

559

## 560 **References**

561 1. World Health Organization. Adolescent pregnancy: key facts (2018). [Cited 2019 Jan 5].

562 Available from: <https://www.who.int/news-room/fact-sheets/detail/adolescent-pregnancy>.

563 2. Neal S, Matthews Z, Frost M, Foisted H, Camacho AV, Laski L. Childbearing in adolescents

564 aged 12–15 in low resource countries: a neglected issue. New estimates from demographic

565 and household surveys in 42 countries. Acta Obstet Gynecol Scand. 2012; Available from:

566 <https://doi.org/10.1111/j.1600-0412.2012.01467.x>.

567 3. Unintended Pregnancy in the United States: Fact sheet. [Cited 2021 May 11]. Available from:

568 <https://www.guttmacher.org/sites/default/files/factsheet/fb-unintended-pregnancy-us.pdf>.

569 4. Tanzania Demographic and Health Survey and Malaria Indicator Survey. Dar es Salaam,

570 Tanzania. MoHCDGEC Ministry of Health CD, Gender, Elderly and Children -

571 MoHCDGEC/Tanzania Mainland, MOH Ministry of Health - MoH/Zanzibar, NBS National

572 Bureau of Statistics - NBS/Tanzania. OCGS Office of Chief Government Statistician -

573 OCGS/Zanzibar, ICF. 2015 – 2016. [Cited 2019 Jun 2]. Available from:

574 <https://dhsprogram.com/pubs/pdf/FR321/FR321.pdf>.

- 575 5. The United Republic of Tanzania. The National Road Map Strategic Plan II to Improve  
576 Reproductive, Maternal, Newborn, Child and Adolescent Health in Tanzania. Ministry Of  
577 Health, Community Development, Gender, Elderly, and Children. 2016 – 2020. [Cited 2019  
578 May 7]. Available from:  
579 [https://www.globalfinancingfacility.org/sites/gff\\_new/files/Tanzania\\_One\\_Plan\\_II.pdf](https://www.globalfinancingfacility.org/sites/gff_new/files/Tanzania_One_Plan_II.pdf).
- 580 6. The United Republic of Tanzania. The National Family Planning Costed Implementation  
581 Program. Ministry of Health and Social Welfare. 2010-2015. [cited 2019 Apr 3]. Available  
582 from: [http://ec2-54-210-230-186.compute-1.amazonaws.com/wp-](http://ec2-54-210-230-186.compute-1.amazonaws.com/wp-content/uploads/2014/10/NFPCIP_Amendment_NEW2.pdf)  
583 [content/uploads/2014/10/NFPCIP\\_Amendment\\_NEW2.pdf](http://ec2-54-210-230-186.compute-1.amazonaws.com/wp-content/uploads/2014/10/NFPCIP_Amendment_NEW2.pdf).
- 584 7. Population Reference Bureau. Tanzania Youth Reproductive Health: Satisfying an unmet need  
585 for family planning. 2015. [cited 2019 July 5]. Available from:  
586 <https://assets.prb.org/pdf15/unmetneed-factsheet-tanzania.pdf>.
- 587 8. United Nations Population Fund. Adolescent Pregnancy: A Review of the Evidence. 2013.  
588 [cited 2019 May 1]. Available from: [https://www.unfpa.org/sites/default/files/pub-](https://www.unfpa.org/sites/default/files/pub-pdf/ADOLESCENT%20PREGNANCY_UNFPA.pdf)  
589 [pdf/ADOLESCENT%20PREGNANCY\\_UNFPA.pdf](https://www.unfpa.org/sites/default/files/pub-pdf/ADOLESCENT%20PREGNANCY_UNFPA.pdf).
- 590 9. Briggs G, Brownell M, Ross N. Teen mothers, and socioeconomic status. The chicken-egg  
591 debate. Journal of the Association for Research on Mothering”. 2007; 9(1): 62-74. [Cited 2019  
592 June 20]. Available from:  
593 <https://jarm.journals.yorku.ca/index.php/jarm/article/view/5136/4332>.
- 594 10. Jones ME, Mondy LW. Lessons for prevention and intervention in adolescent pregnancy: A  
595 five-year comparison of outcomes of low programs for school-aged pregnant adolescents. J

- 596        Pediatr Health Care. 1994; 8(4):152-9. Available from: <https://doi.org/10.1016/0891->  
597        [5245\(94\)90027-2](https://doi.org/10.1016/0891-5245(94)90027-2)
- 598    11. Mushy SE, Tarimo EAM, Fredrick MA, Horiuchi S. Barriers to the uptake of modern family  
599        planning methods among female youth of Temeke District in Dar es Salaam, Tanzania: A  
600        qualitative study. Sex Reprod Healthc. 2020; 24. Available from:  
601        <https://doi.org/10.1016/j.srhc.2020.100499>.
- 602    12. Darroch JE, Woog V, Bankole A, Ashford LS. Adding It Up: Costs and Benefits of Meeting  
603        the Contraceptive Needs of Adolescents, New York: Guttmacher Institute. 2016. [Cited 2020  
604        Jan 11]. Available from: [https://www.guttmacher.org/report/adding-it-meeting-](https://www.guttmacher.org/report/adding-it-meeting-contraceptive-needs-of-adolescent)  
605        [contraceptive-needs-of-adolescent](https://www.guttmacher.org/report/adding-it-meeting-contraceptive-needs-of-adolescent).
- 606    13. Cleland J, Conde-Agudelo A, Peterson H, Ross J, Tsui A. Family planning needs during the  
607        first two years postpartum in Tanzania. Contraception and health. The Lancet. 2012;  
608        380(9837):149-56. [Cited 2020 Feb 15]. Available from:  
609        <https://www.mchip.net/sites/default/files/Tanzania-PPFP.pdf>.
- 610    14. Oringanje C, Meremikwu MM, Eko H, Esu E, Meremikwu A, Ehiri JE. Interventions for  
611        preventing unintended pregnancies among adolescents. Cochrane Database of Syst Rev. 2016;  
612        2:CD005215. Available from: <https://doi.org/10.1002/14651858.CD005215.pub3>.
- 613    15. Alford S, Rutledge A, Huberman B. Science and success. The programs that worked to prevent  
614        subsequent pregnancy among adolescent mothers. Advocates for youth. 2009. [Cited 2020  
615        Nov 1]. Available from:



- 616 <https://www.advocatesforyouth.org/wpcontent/uploads/storage//advfy/documents/sspregnancies.pdf>.
- 617
- 618 16. De Jonge HCC, Azad K, Seward N, Kuddus A, Shaha S, Costello A, et al. Determinants and  
619 consequences of short birth interval in rural Bangladesh: a cross-sectional study. BMC  
620 Pregnancy Childbirth. 2014; 14: 427 Available from: [https://doi.org/10.1186/s12884-014-](https://doi.org/10.1186/s12884-014-0427-6)  
621 [0427-6](https://doi.org/10.1186/s12884-014-0427-6).
- 622 17. Primary health care: Report of the international conference on primary health care. Alma-Ata,  
623 USSR, 6 – 12 September 1978. Jointly sponsored by the World Health Organization and the  
624 United Nations Children's Fund. [Cited 2019 May 7]. Available from:  
625 <https://www.who.int/publications/i/item/9241800011>.
- 626 18. The American College of Obstetricians and Gynecologists. Long-acting reversible  
627 contraception: implants and intrauterine devices. Obstet Gynecol. 2017; 130:251-69. [Cited  
628 2021 May 1]. Available from: [https://www.acog.org/clinical/clinical-guidance/practice-](https://www.acog.org/clinical/clinical-guidance/practice-bulletin/articles/2017/11/long-acting-reversible-contraception-implants-and-intrauterine-devices)  
629 [bulletin/articles/2017/11/long-acting-reversible-contraception-implants-and-intrauterine-](https://www.acog.org/clinical/clinical-guidance/practice-bulletin/articles/2017/11/long-acting-reversible-contraception-implants-and-intrauterine-devices)  
630 [devices](https://www.acog.org/clinical/clinical-guidance/practice-bulletin/articles/2017/11/long-acting-reversible-contraception-implants-and-intrauterine-devices).
- 631 19. Baldwin MK, Edelman AB. The effect of long-acting reversible contraception on rapid repeat  
632 pregnancy in adolescents: a review. J Adolesc Health. 2013; 52(4): 47 - 53. Available from:  
633 <https://doi.org/10.1016/j.jadohealth.2012.10.278>.
- 634 20. Stacey D, Légaré F, Lewis K, Barry MJ, Bennett CL, Eden KB, et al. Decision aids for people  
635 facing health treatment or screening decisions. Cochrane Database of Syst Rev-Intervention.  
636 2017. Available from: <https://doi.org/10.1002/14651858.CD001431.pub5>.

- 637 21. Bennett KF, Wagner VC, Robb KA. Supplementing factual information with patient narratives  
638 in the cancer screening context: a qualitative study of acceptability and preferences. 2015; 18:  
639 2032 - 2041. Available from: <https://doi.org/10.1111/hex.12357>.
- 640 22. Wu JP, Damnsroder LJ, Feters MD, Zikmund-Fisher BJ, Hudson SV, Fucinari JBS, et al. A  
641 Web-based decision tool to improve contraceptive counseling for women with chronic  
642 medical conditions: Protocol for a mixed-methods implementation study. 2018; 7(4).  
643 Available from: <https://doi.org/10.2196/resprot.9249>.
- 644 23. Kim YM, Davila C, Tellez C, Kols A. Evaluation of the World Health Organization's family  
645 planning decision-making tool: improving health communication in Nicaragua. Patient  
646 Education and Counseling. 2007; 66(2): 235 – 242. Available from:  
647 <https://doi.org/10.1016/j.pec.2006.12.007>.
- 648 24. Ganti A (2019). Central Limit Theorem. Oxford Executive MBA. [Cited 2021 August 13].  
649 Available from:  
650 [https://www.investopedia.com/terms/c/central\\_limit\\_theorem.asp#:~:text=Key%20Takeawa  
651 ys,The%20central%20limit%20theorem%20\(CLT\)%20states%20that%20the%20distributio  
652 n%20of,for%20the%20CLT%20to%20hold](https://www.investopedia.com/terms/c/central_limit_theorem.asp#:~:text=Key%20Takeaways,The%20central%20limit%20theorem%20(CLT)%20states%20that%20the%20distribution%20of,for%20the%20CLT%20to%20hold).
- 653 25. Shishido E, Osaka W, Henna A, Motomura Y, Horiuchi S. Effect of a decision aid on the  
654 choice of pregnant women whether to have epidural anesthesia or not during labor. PLoS One.  
655 2020; 15(11). Available from: <https://doi.org/10.1371/journal.pone.0242351>.
- 656 26. Osaka W, Nakayama K. Effect of a decision aid with patient narratives in reducing decisional  
657 conflict in choice for surgery among early-stage breast cancer patients: A three-arm

- 658 randomized controlled trial. *Patient Educ Couns*. 2017; 100(3): 550 - 562. Available from:  
659 <https://doi.org/10.1016/j.pec.2016.09.011>.
- 660 27. Brown S, Lumley J. Satisfaction with care in labor and birth: A survey of 790 Australian  
661 women. *Birth Issues in Prenatal Care*. 1994; 21(1): 4 - 13. Available from:  
662 <https://doi.org/10.1111/j.1523-536x.1994.tb00909.x>.
- 663 28. Ottawa Patient Decision Aid Development eTraining (ODAT). *Patient Decision Aids*. [Cited  
664 2021 01 2]. Available from: <https://decisionaid.ohri.ca/index.html>.
- 665 29. The International Patient Decision Aid Standards (IPDAS) Collaboration. IPDAS Criteria for  
666 Judging the Quality of Patients Decision Aids. 2005. [Cited 2021 01 2]. Available from:  
667 [http://ipdas.ohri.ca/IPDAS\\_checklist.pdf](http://ipdas.ohri.ca/IPDAS_checklist.pdf).
- 668 30. Ajzen I. The theory of planned behavior. *Organizational Behavior and Human Decision*  
669 *Processes*. 1991; 50(2): 179 - 211. Available from: [https://doi.org/10.1016/0749-](https://doi.org/10.1016/0749-5978(91)90020-T)  
670 [5978\(91\)90020-T](https://doi.org/10.1016/0749-5978(91)90020-T).
- 671 31. Green EC, Murphy E. Health belief model. In: *Wiley Blackwell Encyclopedia of Health,*  
672 *Illness, Behavior, and Society*. Wiley Online Library. 2014. Available from:  
673 <https://doi.org/10.1002/9781118410868.wbehibs410>.
- 674 32. Bandura A. Social cognitive theory. In P.A.M. Van Lange, A.W. Kruglanski, & E. T. Higgins  
675 (Eds.), *Handbook of theories of social psychology* (pp. 349 – 373). Sage Publications Ltd.  
676 2012. Available from: <https://doi.org/10.4135/9781446249215.n18>.

- 677 33. World Health Organization (WHO) and Johns Hopkins Bloomberg School of Public Health.  
678 Center for Communication Programs. Information and Knowledge for Optimal Health  
679 (INFO). Decision-making tool for family planning clients and providers. Baltimore,  
680 Maryland, INFO and Geneva, WHO. (WHO Family Planning Cornerstone). 2015. [Cited  
681 2019 12 6]. Available from:  
682 [https://apps.who.int/iris/bitstream/handle/10665/43225/9241593229\\_eng.pdf;jsessionid=9D](https://apps.who.int/iris/bitstream/handle/10665/43225/9241593229_eng.pdf;jsessionid=9D552FBA2D0A7F09857A01137127E5FE?sequence=2)  
683 [552FBA2D0A7F09857A01137127E5FE?sequence=2](https://apps.who.int/iris/bitstream/handle/10665/43225/9241593229_eng.pdf;jsessionid=9D552FBA2D0A7F09857A01137127E5FE?sequence=2).
- 684 34. Peipert JF, Zhao Q, Allsworth JE, Petrosky E, Madden T, Eisenberg D, et al. Continuation  
685 and satisfaction of reversible contraception. *Obstet. Gynecol.* 2011; 117(5): 1105 – 1113.  
686 Available from: <https://doi.org/10.1097/AOG.0b013e31821188ad>.
- 687 35. Yisa SB, Okenwa AA, Husemeyer RP. Treatment of pelvic endometriosis with etonogestrel  
688 subdermal implant (Implanon®). *J Fam Plann Reprod Health Care.* 2005; 31(1): 67 - 70.  
689 Available from: <https://doi.org/10.1783/0000000052972799>.
- 690 36. Funk S, Miller MM, Mishell DR, Archer DF, Poindexter A, Schmidt J, et al. Safety and  
691 efficacy of Implanon, a single-rod implantable contraceptive containing etonogestrel.  
692 *Contraception.* 2005; 71(5): 319 - 326. Available from:  
693 <https://doi.org/10.1016/j.contraception.2004.11.007>.
- 694 37. Hubacher D, Grimes DA. Non-contraceptive health benefits of intrauterine devices: a  
695 systematic review. *Obstet Gynecol Surv.* 2002; 57(2): 120 - 128. Available from:  
696 <https://doi.org/10.1097/00006254-200202000-00024>.

- 697 38. Zheng SR, Zheng HM, Qian SZ, Sang GW, Kaper RF. A randomized multicenter study  
698 comparing the efficacy and bleeding pattern of a single-rod (Implanon) and a six-capsule  
699 (Norplant) hormonal contraceptive implant. *Contraception*. 1999; 60(1): 1 - 8. Available from:  
700 [https://doi.org/10.1016/S0010-7824\(99\)00053-0](https://doi.org/10.1016/S0010-7824(99)00053-0).
- 701 39. Soeprono R. Return to fertility after discontinuation of copper IUD use: a study of 55  
702 pregnancies involving Multiload Cu-250 users among private patients in Indonesia. *Adv*  
703 *Contracept*. 1988; 4: 95 - 107. Available from: <https://doi.org/10.1007/BF01849510>.
- 704 40. Buckshee K, [Chatterjee P](#), [Dhall GI](#), [Hazra MN](#), [Kodkany BS](#), [Lalitha K](#), et al. Return of  
705 fertility following discontinuation of Norplant-II subdermal implants: ICMR task force on  
706 hormonal contraception. *Contraception*. 1995;51(4): 237 - 242. Available from:  
707 [https://doi.org/10.1016/0010-7824\(95\)00039-D](https://doi.org/10.1016/0010-7824(95)00039-D).
- 708 41. Mushy SE, Shishido E, Leshabari S, Horiuchi S. Postpartum green star family planning  
709 decision aid for pregnant adolescents in Tanzania: A qualitative feasibility study. *BMC*  
710 *Reprod Health*. 2021; 18; 170. Available from: <https://doi.org/10.1186/s12978-021-01216-6>.
- 711 42. O'Connor AM (2010). User Manual-Decisional Conflict Scale (10 item questions format).  
712 Ottawa: Ottawa Hospital Research Institute. [Cited 2020 10 15] Available from:  
713 [http://decisionaid.ohri.ca/docs/develop/User\\_Manuals/UM\\_Decisional\\_Conflict.pdf](http://decisionaid.ohri.ca/docs/develop/User_Manuals/UM_Decisional_Conflict.pdf).
- 714 43. Lopez LM, Grey TW, Chen M, Hiller JE. Strategies for improving postpartum contraceptive  
715 use: evidence from non-randomized studies. *Cochrane Database Syst Rev*. 2014; 11.  
716 Available from: <https://doi.org/10.1002/14651858.CD011298.pub22>.

- 717 44. Mathers N, Ng CJ, Campbell MJ, Colwell B, Brown I, Bradley A. Clinical effectiveness of a  
718 patient decision aid to improve decision quality and glycemetic control in people with diabetes  
719 making treatment choices: a cluster randomized controlled trial (PANDAs) in general  
720 practice. *BMJ Open*. 2012; 2:e001469. Available from: [https://doi.org/10.1136/bmjopen-](https://doi.org/10.1136/bmjopen-2012-001469)  
721 [2012-001469](https://doi.org/10.1136/bmjopen-2012-001469).
- 722 45. Mullan RJ, Montori VM, Shah ND, Christianson TJH, Bryant SC, Guyatt GH, et al. The  
723 diabetes mellitus medication choice decision aid: A randomized trial. *Arch Intern Med*.  
724 2009; 169(17):1560 - 1568. Available from:  
725 <https://doi.org/10.1001/archinternmed.2009.293>.
- 726 46. Nassar N, Roberts CL, Raynes-Greenow CH, Barratt A, Peat B. Evaluation of a decision aid  
727 for women with breech presentation at term: A randomized controlled trial. *Int J Obstet and*  
728 *Gy*. 2007; 114(3):325-33. Available from: [https://doi.org/10.1111/j.1471-](https://doi.org/10.1111/j.1471-0528.2006.01206.x)  
729 [0528.2006.01206.x](https://doi.org/10.1111/j.1471-0528.2006.01206.x).
- 730 47. Brazell HD, O'Sullivan DM, Forrest A, Greene JF. Effect of a decision aid on decision making  
731 for the treatment of pelvic organ prolapse. *Female Pelvic Med Reconstr Surg*. 2015;  
732 21(4):231-5. Available from: <http://doi.org/10.1097/SPV.0000000000000149>.
- 733 48. Vedasto O, Morris B, Furia FF. Shared decision-making between health care providers and  
734 patients at a tertiary hospital diabetic Clinic in Tanzania. *BMC Health Serv Res*. 2021; 21;  
735 8. Available from: <https://doi.org/10.1186/s12913-020-06041-4>.
- 736 49. Nagle C, Gunn J, Bell R, Lewis S, Meiser B, Metcalfe S, et al. Use of a decision aid for prenatal  
737 testing of fetal abnormalities to improve women's informed decision making: a cluster

738 randomized controlled trial [ISRCTN22532458]. BJOG. 2008;115(3):339-47. Available  
739 from: <https://doi.org/10.1111/j.1471-0528.2007.01576.x>. PMID:18190370.

740 50. Chewning B, Mosena P, Wilson D, Erdman H, Potthoff S, Murphy A, et al. Evaluation of a  
741 computerized contraceptive decision aid for adolescent patients. Patient Educ Couns.  
742 1999;38(3):227-39. Available from: [https://doi.org/10.1016/s0738-3991\(99\)00014-2](https://doi.org/10.1016/s0738-3991(99)00014-2).

743

## 744 **Supporting information**

745 A “Green Star” family planning decision aid

746

## 747 **Author Contributions**

748 **Conceptualization:** Stella E. Mushy, Eri Shishido, Shigeko Horiuchi

749 **Data curation:** Shigeko Horiuchi

750 **Formal analysis:** Stella E. Mushy, Eri Shishido, Shigeko Horiuchi

751 **Funding acquisition:** Shigeko Horiuchi

752 **Investigation:** Stella E. Mushy, Shigeko Horiuchi

753 **Methodology:** Stella E. Mushy, Eri Shishido, Shigeko Horiuchi

754 **Project administration:** Stella E. Mushy consideration

755 **Resources:** Shigeko Horiuchi

756 **Supervision:** Stella E. Mushy, Eri Shishido, Shigeko Horiuchi

757 **Validation:** Eri Shishido, Shigeko Horiuchi

758 **Visualization:** Eri Shishido

759 **Writing – original draft:** Stella E. Mushy

760 **Writing – review & editing:** Stella E. Mushy, Eri Shishido, Shigeko Horiuchi



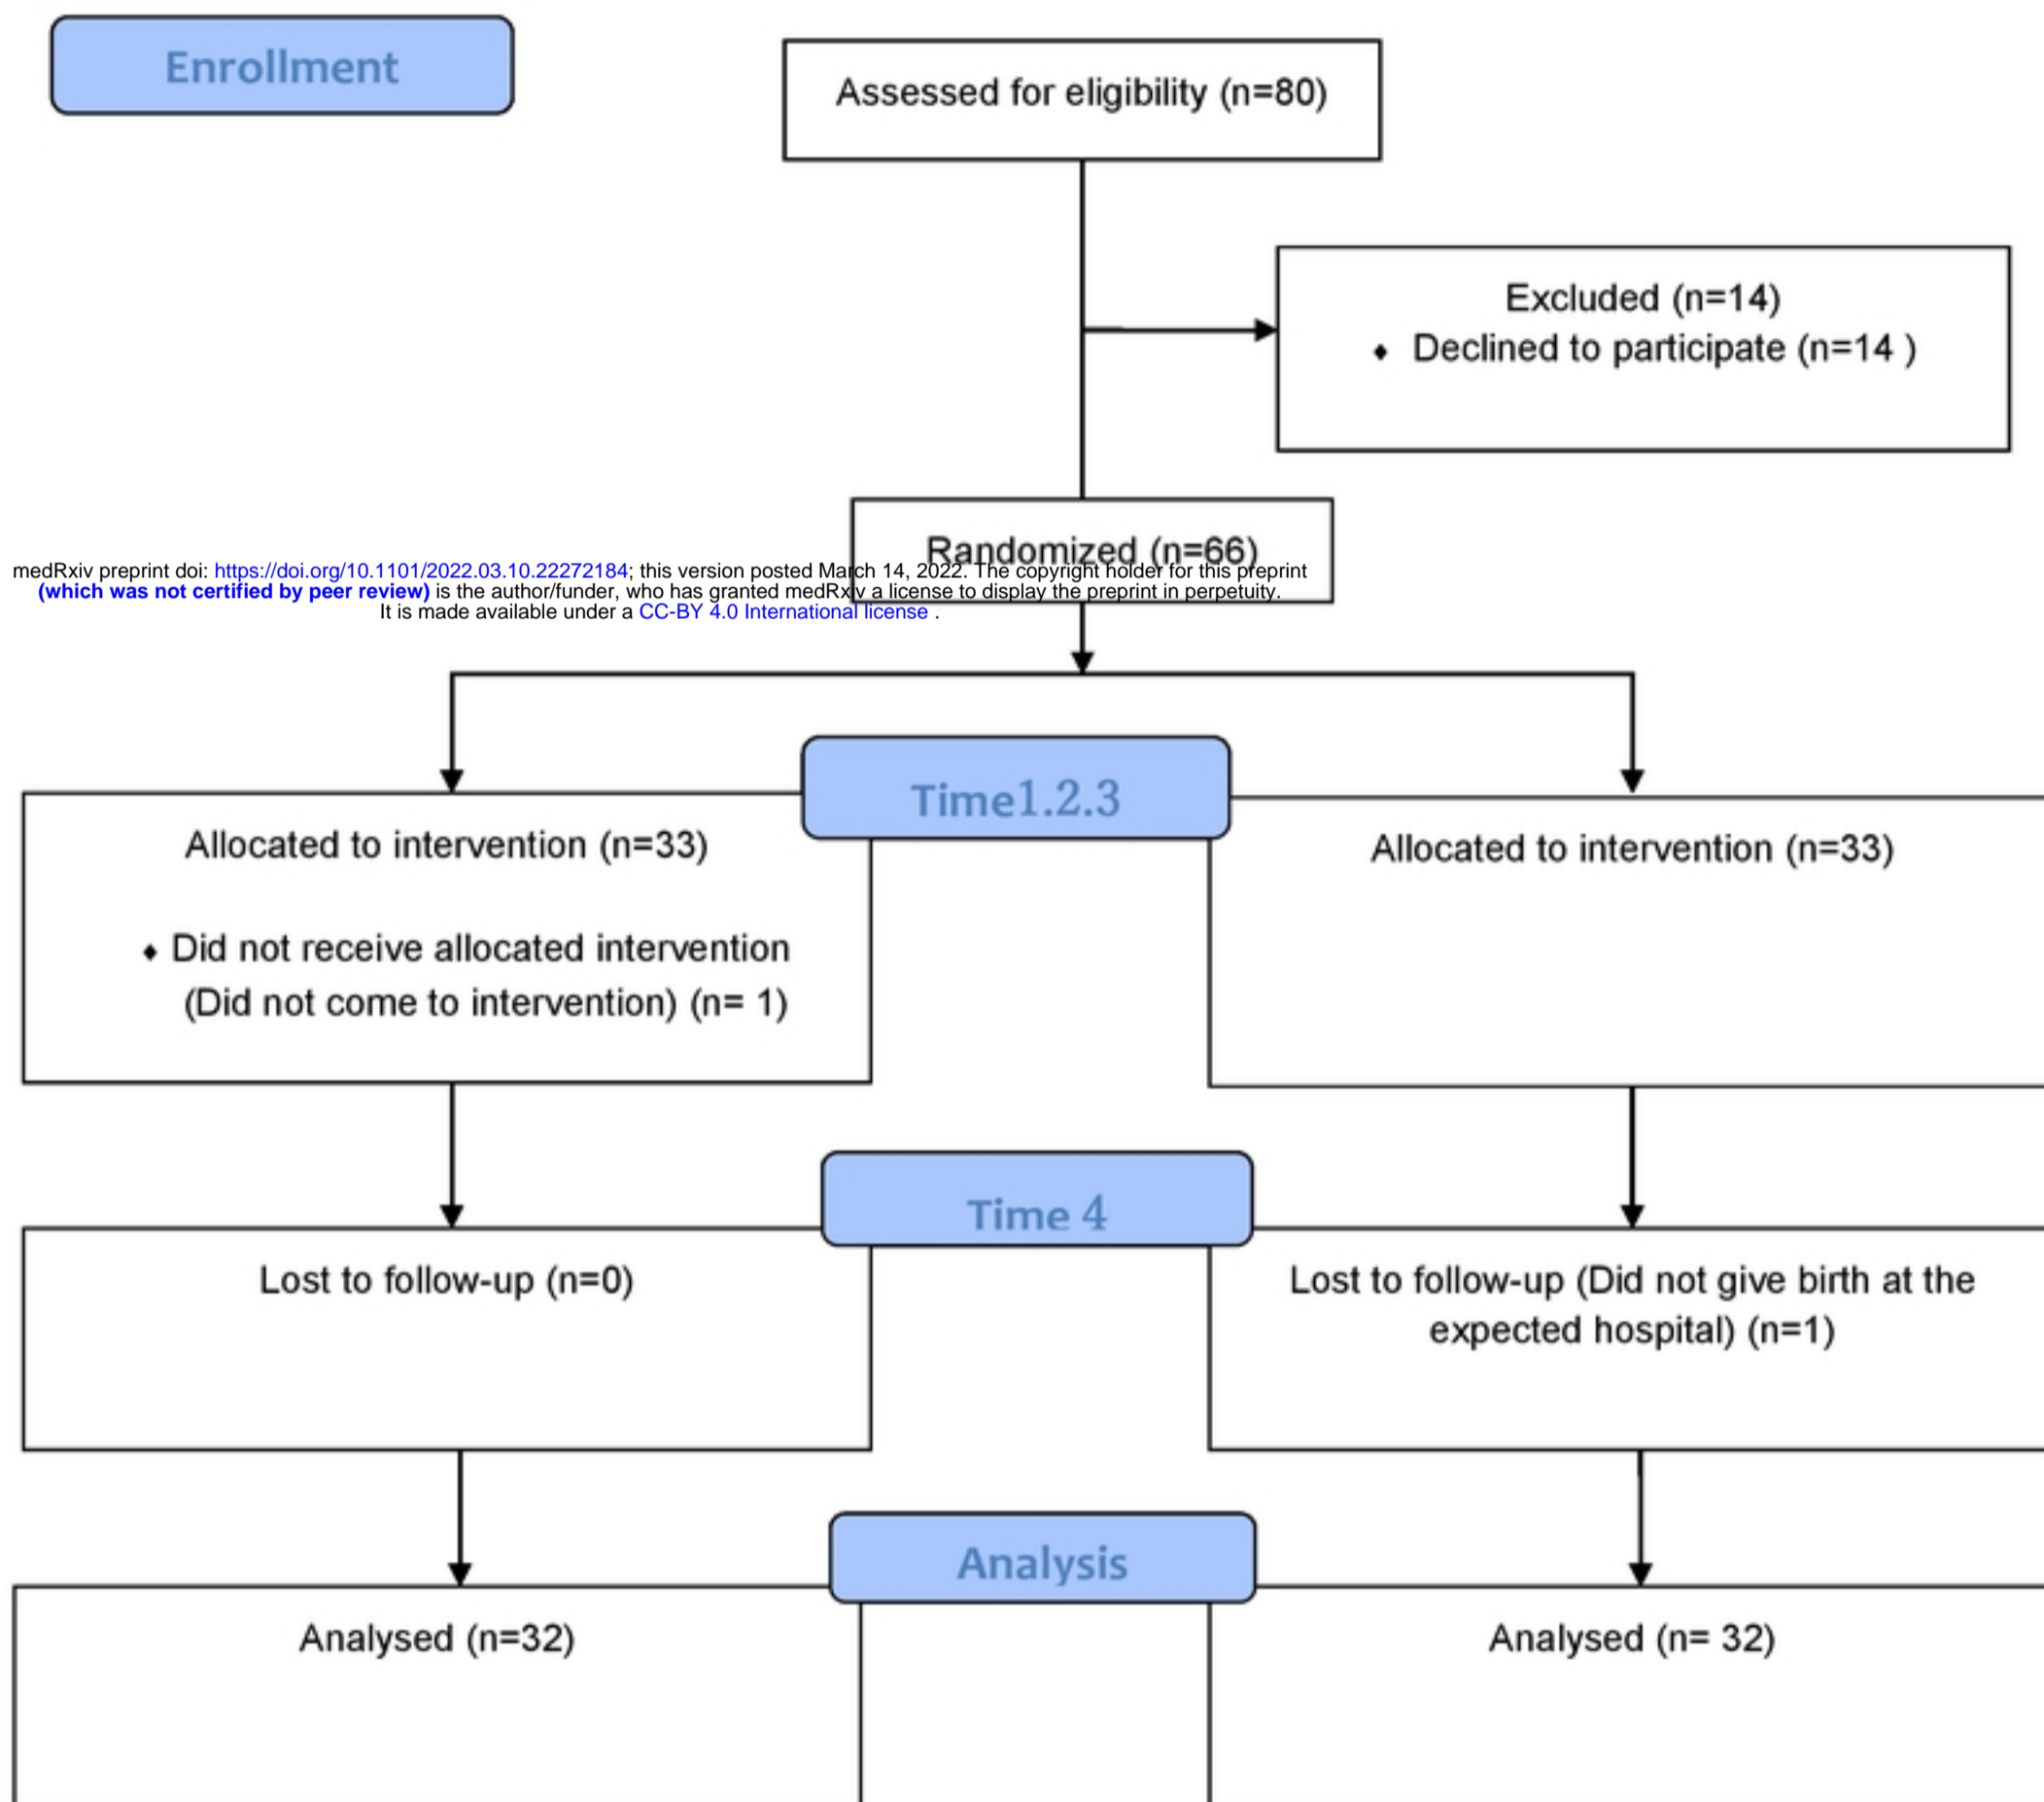

**Fig. 1. Flow diagram of study participants**
